# Supplementary material for: The Neuroinflammasome in Alzheimer's Disease and Cerebral Stroke
Source: PubMed Central journal article supplement — Dement Geriatr Cogn Dis Extra. 2021 Jun 10;11(2):159–67. doi: 10.1159/000516074 (PMC8255751; doi:10.1159/000516074), 2021-06-10

[별지 제4호서식]

Medical Refer Form

|                                                                                                                                                                            |                                                                                                                                                                                                                                                                                                                                                                                                                                                                                                                                                                                                                                                      |               |                                                                          |                                                                                                                                                                                                                                                                                                                                                                                                      |  |
|----------------------------------------------------------------------------------------------------------------------------------------------------------------------------|------------------------------------------------------------------------------------------------------------------------------------------------------------------------------------------------------------------------------------------------------------------------------------------------------------------------------------------------------------------------------------------------------------------------------------------------------------------------------------------------------------------------------------------------------------------------------------------------------------------------------------------------------|---------------|--------------------------------------------------------------------------|------------------------------------------------------------------------------------------------------------------------------------------------------------------------------------------------------------------------------------------------------------------------------------------------------------------------------------------------------------------------------------------------------|--|
| 요양급여의뢰서                                                                                                                                                                    |                                                                                                                                                                                                                                                                                                                                                                                                                                                                                                                                                                                                                                                      |               |                                                                          |                                                                                                                                                                                                                                                                                                                                                                                                      |  |
| 건강보험증번호(사업장기호)                                                                                                                                                             |                                                                                                                                                                                                                                                                                                                                                                                                                                                                                                                                                                                                                                                      |               |                                                                          |                                                                                                                                                                                                                                                                                                                                                                                                      |  |
| 가입자 또는 세대주                                                                                                                                                                 | 성명                                                                                                                                                                                                                                                                                                                                                                                                                                                                                                                                                                                                                                                   | 주민등록(관리)번호    | 331209-                                                                  |                                                                                                                                                                                                                                                                                                                                                                                                      |  |
| 환자                                                                                                                                                                         | 성명                                                                                                                                                                                                                                                                                                                                                                                                                                                                                                                                                                                                                                                   | 주민등록(관리)번호    | 331209-                                                                  |                                                                                                                                                                                                                                                                                                                                                                                                      |  |
| 주소                                                                                                                                                                         | (전화 : 010-7123-1960 )                                                                                                                                                                                                                                                                                                                                                                                                                                                                                                                                                                                                                                |               |                                                                          |                                                                                                                                                                                                                                                                                                                                                                                                      |  |
| Diagnosis<br>상 병 명                                                                                                                                                         | 상세불명의 뇌경색증 Non-specific cerebral infarct<br>상세불명의 편마비 Non-specific hemiplegia<br>삼킴곤란 Swallowing difficulty<br>비정형 또는 혼합형 알츠하이머병에서의 치매(G 30.8†)<br>Atypical or combined dementia due to Alzheimer's Disease                                                                                                                                                                                                                                                                                                                                                                                                                                          | ICD<br>상병분류기호 | I639<br>G819<br>R13<br>F002                                              |                                                                                                                                                                                                                                                                                                                                                                                                      |  |
| Hospitalization Period<br>진료기간                                                                                                                                             | 2020. 05. 25. ~ 2020. 09. 12.                                                                                                                                                                                                                                                                                                                                                                                                                                                                                                                                                                                                                        | 진료구분          | <input checked="" type="checkbox"/> 1. 입원 <input type="checkbox"/> 2. 외래 |                                                                                                                                                                                                                                                                                                                                                                                                      |  |
| Pt. Condition & Treatment Description<br>환자상태 및 진료소견 (구체적으로 기술)                                                                                                            | <p>상기 환자 Rt hemiplegia a/w Lt PCA-MCA borderzone infarction (2020.5.10)로 입원 중인 환자입니다. 전원드리게 된 이유는,</p> <p>#1. 환자 Hb 6.9-8.3 수준을 유지하여 왔으나 9.3일 6.7로 떨어지고, 9.12일 5.9로 감소하였습니다.</p> <p>#2. pneumonia로 인한 poor saturation(80%대) 보입니다.</p> <p>Most current CBC result (usually showed Hb 7):<br/>                 CBC 최근 결과는 아래와 같습니다. (평소 Hb 7정대 보였습니다)<br/>                 9.10 CBC 7100-6.5-19.2-229k<br/>                 9.11 CBC 16400-6.4-19.2-200k<br/>                 9.12 CBC 14700-5.9-17.5-186k</p> <p>9.3 시행한 분변검사서에서 blood 관찰되지 않고, 이후 시행한 U/A에서도 hematuria 전혀 없습니다. melena나 gross HU도 없습니다. anemia lab에서 anemia of chronic ds로 impre</p> |               |                                                                          | Pt. is hospitalized (2020.5.10) for Rt hemiplegia a/w Lt PCA-MCA borderzone infarction. Pt. is transferred for the following reasons:<br>#1. Pt. maintained Hb 6.9-8.3 but decreased to 6.7 on 9/3 and 5.9 on 9/12.<br># 2. Shows poor saturation (~80%) due to pneumonia.<br>No occult blood at stool exam on 9/3. No hematuria at U/A. No melena nor gross HU. Suspected anemia of chronic disease |  |
| 국민건강보험요양급여의기준에관한규칙 제6조제3항의 규정에 의하여 위와 같이 요양급여를 의뢰합니다.<br>2020년 09월 12일                                                                                                     |                                                                                                                                                                                                                                                                                                                                                                                                                                                                                                                                                                                                                                                      |               |                                                                          |                                                                                                                                                                                                                                                                                                                                                                                                      |  |
| 요양기관기호(명칭) : 31287476 ( 참우리요양병원 )<br>소재지 : 경기도 광주시 광주대로 45(경안동)<br>대표자 :                                                                                                   |                                                                                                                                                                                                                                                                                                                                                                                                                                                                                                                                                                                                                                                      |               |                                                                          |                                                                                                                                                                                                                                                                                                                                                                                                      |  |
| 담당의사 성명 : (97902)                                                                                                                                                          |                                                                                                                                                                                                                                                                                                                                                                                                                                                                                                                                                                                                                                                      |               |                                                                          |                                                                                                                                                                                                                                                                                                                                                                                                      |  |
| 요양기관대표자 귀하                                                                                                                                                                 |                                                                                                                                                                                                                                                                                                                                                                                                                                                                                                                                                                                                                                                      |               |                                                                          |                                                                                                                                                                                                                                                                                                                                                                                                      |  |
| 주 : 1. 이 요양급여의뢰서는 요양급여를 행함에 있어 적절한 요양급여를 위하여 다른 요양기관으로 의뢰하는 경우에 담당의사로부터 무상으로 교부됩니다.<br>2. 환자상태 및 진료소견란에는 현증상, 검사, 투약 등 주요진료내용을 구체적으로 기재하기 바라며, 해당란이 부족한 때에는 뒷면을 활용하기 바랍니다. |                                                                                                                                                                                                                                                                                                                                                                                                                                                                                                                                                                                                                                                      |               |                                                                          |                                                                                                                                                                                                                                                                                                                                                                                                      |  |

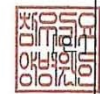

## Pt. Condition &amp; Treatment Description (cont.)

## 환자상태 및 진료소견

ssion 잡은 상태입니다.

9.11 WBC 상승에 대해 CXR 촬영하여 pneumonia 진단 하에 tazobaxin+levofloxacin start 하였습니다. BT 36.6이고 가래는 늘지 않은 상태이나, SpO2 80%대의 poor saturation 보여 reserved mask하 O2 10L 올려서 SpO2 95% 보입니다. (원래 본원 입원시부터 O2 5L facial mask 유지하던 분입니다)

평소 간혹 mild UTI 있었으나 ciprofloxacin으로 조절되었고, 9.3 Rt hand and forearm edema 있어 r/o CRP S imp 잡았으나, condition상 steroid까지 주기 어려울 듯하여 celecoxib start하였고 edema 감소 추세로 celecoxib 중단하였습니다.

의식 수준은 입원(5.25)부터 9.12일 금일까지 비슷한 수준으로, 의료진을 알아보고 웃거나, drowsy하여 반응 없거나를 반복하는 양상입니다.

보호자께서 답손정 복용을 원하시어 self med로 가져오셔서, 투약 유지 중에 있습니다. (100mg tid)

이에, 수혈 및 폐렴 manage 위하여 전원드리오니, 바쁘신 와중에도 부디 고진선처 부탁드립니다. 감사합니다

On Sept. 11, pneumonia was diagnosed from CXR and increased WBC count, so tazobaxin + levofloxacin were started. BT 36.6°C and no exacerbation of sputum but showed poor SpO2 (80s). SpO2 increased to 95% under reserved mask (O2 flow 10 L) (Pt. has been under facial mask with O2 flow 5L since admission).

Intermittent mild UTI responsive to ciprofloxacin. On Sept. 3<sup>rd</sup>, showed Rt hand and forearm edema, so started celecoxib. Then, edema decreased, so stopped using celecoxib.

Mental status shows no change since admission (5/25) until today (9/12). Repeats showing of social smile to caregivers or drowsiness.

Guardian provided Dapsone and maintaining 100mg tid.

Transferring for blood transfusion and pneumonia management.

## 판독 소견지

차트번호 : 0000001626

검사일자 : 2020년 05월 25일

|         |         |         |            |
|---------|---------|---------|------------|
| 수진자명    |         | 담당 의사   |            |
| 주민번호    | 331209- | 구분      | 입원         |
| 성별 / 연령 |         | 병동 / 병실 | 2병동 / 208호 |

[R]CHEST1 -Chest PA

- Finding

BLL haziness (Rt&gt;Lt)

(인)

[R]ABDOME1 -Abodomen Supine

abd fecal material

possible multiple rib fx

(인)

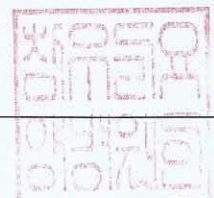

## 판독 소견지

차트번호 : 0000001626

검사일자 : 2020년 09월 03일

|         |         |         |            |
|---------|---------|---------|------------|
| 수진자명    |         | 담당 의사   |            |
| 주민번호    | 331209- | 구분      | 입원         |
| 성별 / 연령 |         | 병동 / 병실 | 2병동 / 208호 |

[R]CHEST1-1 -Chest AP

- Finding

사진이 전반적으로 밝게 나왔으나 특별한 infiltration focus를 찾기 어려움

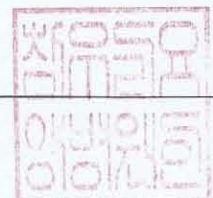

## 판독 소견지

차트번호 : 0000001626

검사일자 : 2020년 09월 11일

|         |         |         |            |
|---------|---------|---------|------------|
| 수진자명    |         | 담당 의사   |            |
| 주민번호    | 331209- | 구분      | 입원         |
| 성별 / 연령 |         | 병동 / 병실 | 2병동 / 208호 |

[R]CHEST1-1 -Chest AP

- Finding

Lt whole lung haziness

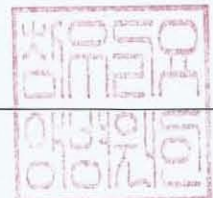

Supplement: dee-0011-0159-s04.pdf [file dee-0011-0159-s04.pdf]
