# Supplementary material for: The Neuroinflammasome in Alzheimer's Disease and Cerebral Stroke
Source: PubMed Central journal article supplement — Dement Geriatr Cogn Dis Extra. 2021 Jun 10;11(2):159–67. doi: 10.1159/000516074 (PMC8255751; doi:10.1159/000516074), 2021-06-10
Supplement: dee-0011-0159-s01.pdf [file dee-0011-0159-s01.pdf]

2020.05.12

14:13:58

SE: 307

IM: 1

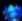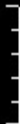

5cm

W:128 L:128

2020.05.12

14:13:59

SE: 307

IM: 2

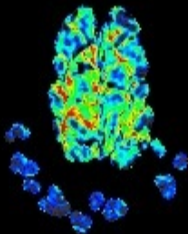

5cm

W:128 L:128

2020.05.12

14:13:59

SE: 307

IM: 3

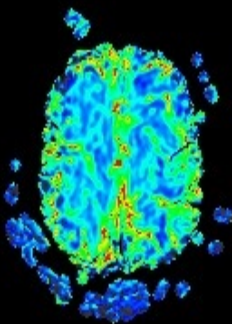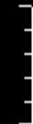

5cm

W:128 L:128

2020.05.12

14:13:59

SE: 307

IM: 4

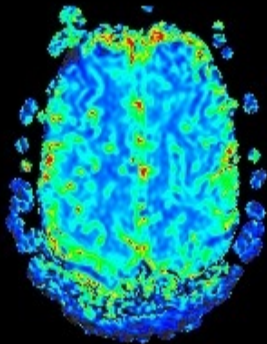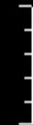

5cm

W:128 L:128

2020.05.12

14:14:00

SE: 307

IM: 5

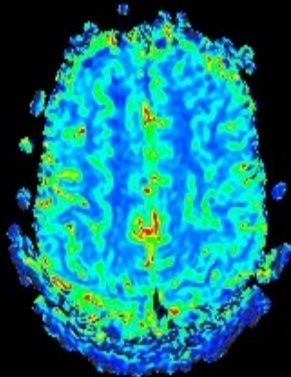

5cm

W:128 L:128

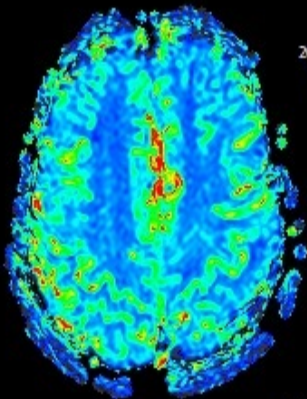

2020.05.12

14:14:00

SE: 307

IM: 6

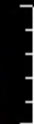

5cm

W:128 L:128

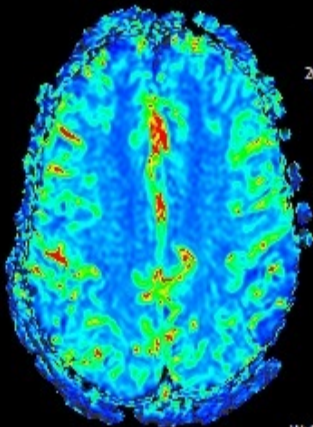

2020.05.12

14:14:00

SE: 307

IM: 7

5cm

W:128 L:128

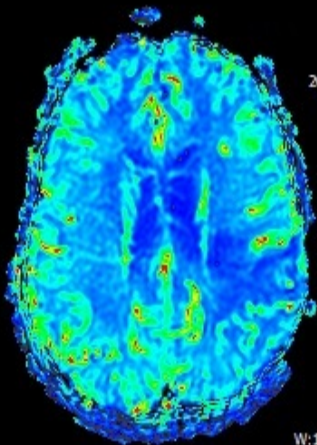

2020.05.12

14:14:00

SE: 307

IM: 8

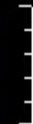

5cm

W:128 L:128



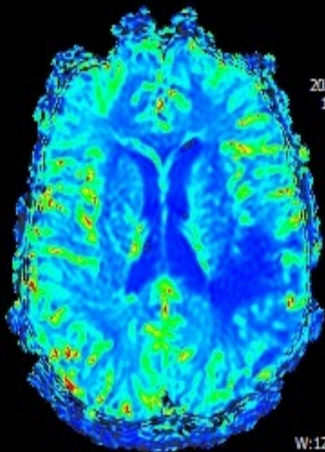

W:128 L:128

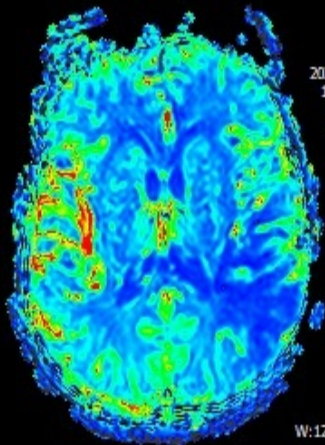

2020.05.12

14:14:01

SE: 307

IM: 10

5cm

W:128 L:128

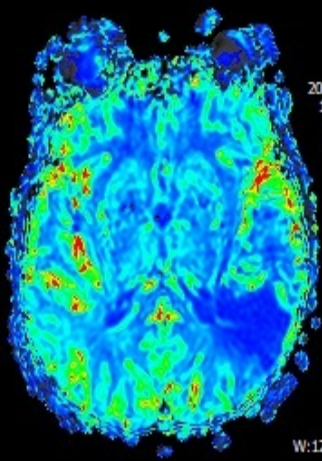

2020.05.12  
14:14:01  
SE: 307  
IM: 11

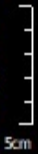

W:128 L:128

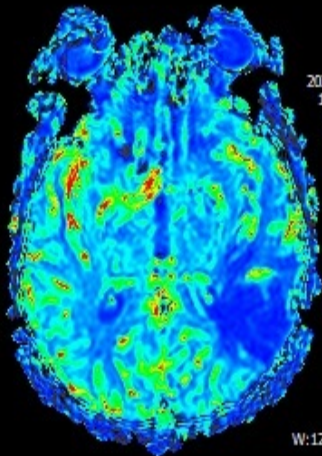

2020.05.12

14:14:01

SE: 307

IM: 12

5cm

W:128 L:128

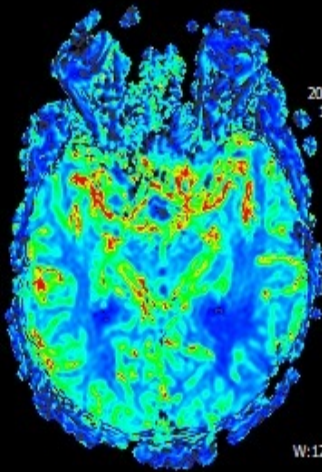

2020.05.12  
14:14:02  
SE: 307  
IM: 13

5cm

W:128 L:128

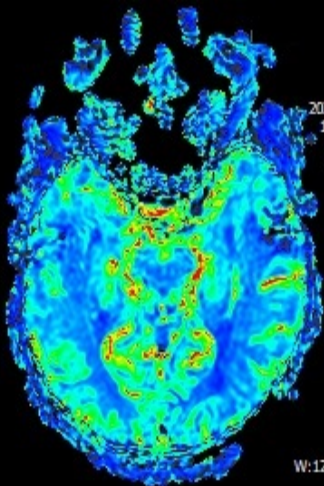

2020.05.12

14:14:02

SE: 307

IM: 14

5cm

W:128 L:128

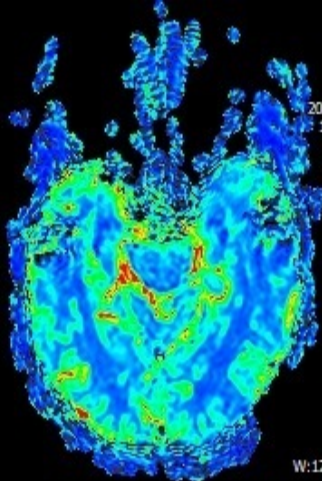

2020.05.12  
14:14:02  
SE: 307  
IM: 15

5cm

W:128 L:128

2020.05.12

14:14:03

SE: 307

IM: 16



5cm

W:128 L:128



F 86Y  
2020.05.12  
14:14:03  
SE: 307  
IM: 17

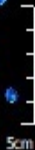

W:128 L:128



F 86Y  
2020.05.12  
14:14:03  
SE: 307  
IM: 18

5cm

W:128 L:128

F 86Y  
2020.05.12  
14:14:03  
SE: 307  
IM: 19

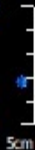

W:128 L:128



F 86Y  
2020.05.12  
14:14:04  
SE: 307  
IM: 20

5cm

W:128 L:128

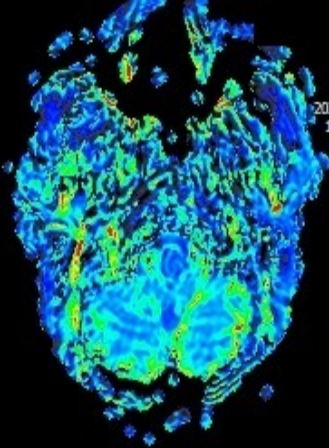

F 86Y  
2020.05.12  
14:14:04  
SE: 307  
IM: 21

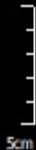

W:128 L:128

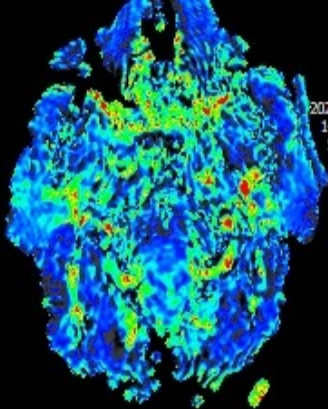

F 86Y  
2020.05.12  
14:14:04  
SE: 307  
IM: 22

5cm

W:128 L:128

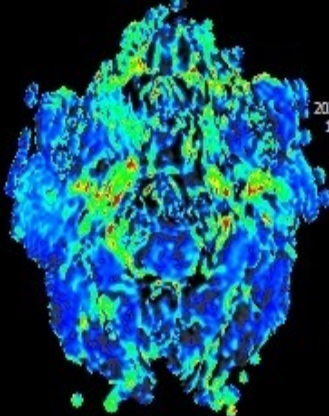

2020.05.12

14:14:05

SE: 307

IM: 23

5cm

W:128 L:128
