# Supplementary material for: The Neuroinflammasome in Alzheimer's Disease and Cerebral Stroke
Source: PubMed Central journal article supplement — Dement Geriatr Cogn Dis Extra. 2021 Jun 10;11(2):159–67. doi: 10.1159/000516074 (PMC8255751; doi:10.1159/000516074), 2021-06-10
Supplement: dee-0011-0159-s05.pdf [file dee-0011-0159-s05.pdf]

# 의무기록사본증명서

발행번호 : 2020-09-00823

등록번호 :

환자명 : [REDACTED]

발급용도 : 논문 제출용

발급매수 : 154 매

담당자 : [REDACTED]

\*담당자의 날인(서명)이 없는 것은 무효임\*

**첨부한 사본은 의무기록 원본과 틀림 없음을 증명합니다.**

본 사본은 상기 용도 외에는 사용할 수 없으며 개인정보보호법 제 21조, 시행령 제 16조에 의거하여 사용 후 즉시 파본, 폐기하여야 합니다.

2020 년 09 월 28 일

인 제 대 학 교 서 울 백 병 원 장

(직인생략)

|                  |                                                                                                                                                                                                  |  |
|------------------|--------------------------------------------------------------------------------------------------------------------------------------------------------------------------------------------------|--|
| 2020-09-12 18:17 | return to ER                                                                                                                                                                                     |  |
| 2020-09-12 18:48 | EKG monitoring 상 sinus rhythm checked<br>O2 saturation 98% checked<br>Lt arm restraint apply상태로 circulation 확인함                                                                                  |  |
| 2020-09-12 18:57 | prof 나중천 외부에서 나간 코로나검사 결과 나올때까지<br>중환자실 음압격리실로 입원하자함                                                                                                                                             |  |
| 2020-09-12 19:37 | Admitted to ICU<br>mental:drowsy pupil Rt 3mm = Lt 3mm (prompt) checked<br>f-cath 통해 600cc urine out 됨<br>코로나 검사 결과 나올때 까지 일반 중환자실의 음압 격리실로<br>입실예정임<br>외부 영양급여의뢰서 1장, 의무기록사본 12장(참우리요양병원)<br>올림 |  |

## 임상관찰기록

|                  |           |                       |                         |                            |
|------------------|-----------|-----------------------|-------------------------|----------------------------|
| 2020-09-13 14:00 | 기본정보 (공통) | 활력증상                  | BT                      | 36.50                      |
| 2020-09-13 14:00 | 기본정보 (공통) | 활력증상                  | HR                      | 84.00                      |
| 2020-09-13 14:00 | 기본정보 (공통) | 활력증상                  | RR                      | 15.00                      |
| 2020-09-13 14:00 | 기본정보 (공통) | 활력증상                  | SPO2                    | 98.00                      |
| 2020-09-13 14:00 | 기본정보 (공통) | 체위변경                  | 체위                      | Head up 30` P.             |
| 2020-09-13 14:00 | 기본정보 (공통) | 체위변경                  | Back massage            | 시행                         |
| 2020-09-13 14:00 | 기본정보 (공통) | 체위변경                  | 피부사정                    | 정상                         |
| 2020-09-13 14:00 | 기본정보 (공통) | 안전                    | 침상난간                    | V                          |
| 2020-09-13 14:00 | 기본정보 (공통) | 안전                    | 낙상방지                    | V                          |
| 2020-09-13 14:00 | 기본정보 (공통) | 신체보호대                 | 적용부위/종류/<br>방법          | 좌측 팔/손목/<br>발목보호대/<br>상지보호 |
| 2020-09-13 14:00 | 기본정보 (공통) | 신체보호대                 | 체위변경(q2hr)              | V                          |
| 2020-09-13 14:00 | 기본정보 (공통) | 신체보호대                 | 사지운동(q2hr)              | V                          |
| 2020-09-13 14:00 | 기본정보 (공통) | 신체보호대                 | 순환/피부상태                 | N                          |
| 2020-09-13 14:00 | 기본정보 (공통) | 신체보호대                 | 섭취/배설                   | V                          |
| 2020-09-13 14:00 | 기본정보 (공통) | 신체보호대                 | 풀어놓기(5~30<br>분사이)       | V                          |
| 2020-09-13 14:00 | 신경계       | LOC                   | Mental                  | Stupor                     |
| 2020-09-13 14:00 | 신경계       | Pupil                 | Rt(mm)                  | 1.5+                       |
| 2020-09-13 14:00 | 신경계       | Pupil                 | Lt(mm)                  | 1.5+                       |
| 2020-09-13 14:00 | 신경계       | 상지 Motor<br>power     | Rt                      | 2.00                       |
| 2020-09-13 14:00 | 신경계       | 상지 Motor<br>power     | Lt                      | 5.00                       |
| 2020-09-13 14:00 | 신경계       | 하지 Motor<br>power     | Rt                      | 3.00                       |
| 2020-09-13 14:00 | 신경계       | 하지 Motor<br>power     | Lt                      | 4.00                       |
| 2020-09-13 14:00 | 신경계       | Glasgow Coma<br>Scale | Eye open                | 3                          |
| 2020-09-13 14:00 | 신경계       | Glasgow Coma<br>Scale | Best verbal<br>response | 3                          |
| 2020-09-13 14:00 | 신경계       | Glasgow Coma<br>Scale | Best motor<br>response  | 5                          |
| 2020-09-13 14:00 | 신경계       | Glasgow Coma<br>Scale | Total(15~3)             | 11.00                      |
| 2020-09-13 14:00 | Intake    | 수액처방                  | Winuf<br>peri(1450ml)   | 60.00                      |

## 간호기록(NEW)

|                     |  |                                                                                                                                                                                                                                                                                                                                                                                             |  |
|---------------------|--|---------------------------------------------------------------------------------------------------------------------------------------------------------------------------------------------------------------------------------------------------------------------------------------------------------------------------------------------------------------------------------------------|--|
| 2020-09-15<br>10:17 |  | 처방 시행 ==> PCD site Dx                                                                                                                                                                                                                                                                                                                                                                       |  |
| 2020-09-15<br>11:26 |  | 보호자 (딸) Dr<br>이유경과 면담함.                                                                                                                                                                                                                                                                                                                                                                     |  |
| 2020-09-15<br>11:33 |  | 약품식별 내림                                                                                                                                                                                                                                                                                                                                                                                     |  |
| 2020-09-15<br>11:40 |  | Jugular Vein<br>catheter site Dx<br>실시함                                                                                                                                                                                                                                                                                                                                                     |  |
| 2020-09-15<br>14:40 |  | PCD open 함                                                                                                                                                                                                                                                                                                                                                                                  |  |
| 2020-09-15<br>15:20 |  | Dr. 이유경 보호자<br>(셋째딸)과 면담함.                                                                                                                                                                                                                                                                                                                                                                  |  |
| 2020-09-15<br>15:21 |  | transfer to 1024호                                                                                                                                                                                                                                                                                                                                                                           |  |
| 2020-09-15<br>15:30 |  | Transfer to 1024호<br>from ICU<br>전동에 대해 설명함<br>병동 orientation<br>교육함(낙상,화재시<br>비상대피방법등<br>안전관리 등...)<br><br>mental stupor<br>checked.<br>Rt.PCD with C-tube<br>keep 중으로 dark<br>bloody한 양상으로<br>소량 drain<br>되어있으며 PCD<br>insert site clear 함.<br>F-cath keep 중으로<br>yellowish 하게<br>urine out 중임.<br>Rt.ear tarivid apply<br>되어있으며<br>bleeding sx none.<br>2-points restraints<br>apply 중으로 |  |

## 간호기록(NEW)

| 실시일시                | 진단명   | 구분 | 진술문                                                                                                                                                                                                                                                                  | 속성/상세내역 | 작성자 |
|---------------------|-------|----|----------------------------------------------------------------------------------------------------------------------------------------------------------------------------------------------------------------------------------------------------------------------|---------|-----|
| 2020-09-16<br>07:45 |       |    | PCD통해서 night 동안 drain양없음.<br>Rt.arm edema 양상보임.<br>suction시 secretion 많으며 thick한 양상보임.<br>electro lab f/u, NPO(sips) 물양 확인위해 Dr. 유정훈에게 notify함.<br>duty마다 water 100- 100 - 100 섭취하자함.<br>nebulizer or mucomyst 고려해보겠다함.<br>Rt.arm 확인했다함.<br>electro lab f/u 고려해보겠다함. |         | 윤지영 |
| 2020-09-16<br>10:04 | 낙상위험성 | 사정 | 낙상가능성 있음                                                                                                                                                                                                                                                             |         | 한은서 |
| 2020-09-16<br>10:05 | 낙상위험성 | 중재 | 낙상예방법 설명함                                                                                                                                                                                                                                                            |         | 한은서 |
| 2020-09-16<br>10:05 | 낙상위험성 | 중재 | 낙상방지 교육함 (side rail 올림)                                                                                                                                                                                                                                              |         | 한은서 |
| 2020-09-16<br>10:06 |       |    | General weakness 있음.<br>Mental chagne none.<br>간병인 상주 중임.<br>PCD keep 중으로 drainage 되는 양 없음.<br>Rt. arm edema 여전함.<br>Freq. position chagne & suction                                                                                                                 |         | 한은서 |

|                     |       |    |                                                                                                                                                                                                                           |  |  |
|---------------------|-------|----|---------------------------------------------------------------------------------------------------------------------------------------------------------------------------------------------------------------------------|--|--|
|                     |       |    | was done.<br>L-tube keep 중으로<br>no aspiraion sx.<br>F-cath keep 중으로<br>urine yellowish 하게<br>out 됨.<br>Restraints 2points<br>apply 중으로<br>혈액순환 잘 됨.<br>Both side rail up<br>state.                                        |  |  |
| 2020-09-16<br>15:25 | 낙상위험성 | 평가 | 낙상위험성 없음                                                                                                                                                                                                                  |  |  |
| 2020-09-16<br>18:53 |       |    | mental drowsy<br>checked<br>고개끄덕임으로<br>의사표현 가능함<br>Lt. PCD keep중으로<br>소량씩 drain중임<br>no fever & chilling<br>sx<br>TPN fluid dropping<br>중임<br>freq. position<br>change & suction<br>was done<br>간병인 keep state로<br>BR now |  |  |
| 2020-09-16<br>23:25 |       |    | 특이 불편감<br>호소없이 수면중임.<br>Both side rail up<br>중임.                                                                                                                                                                          |  |  |

mental drowsy checked

고개끄덕임으로  
의사표현 가능함

Nodding Head,  
Can express intention

2020-09-16  
18:53

## 간호기록(NEW)

| 실시일시                | 진단명   | 구분 | 진술문                                                                                                                                                                                                                                                                                                                                      | 속성/상세내역 | 작성자 |
|---------------------|-------|----|------------------------------------------------------------------------------------------------------------------------------------------------------------------------------------------------------------------------------------------------------------------------------------------------------------------------------------------|---------|-----|
| 2020-09-17<br>05:00 |       |    | BT 38.2 checked.<br>notif to Dr. 유정훈<br>denogan 주자함.                                                                                                                                                                                                                                                                                     |         |     |
| 2020-09-17<br>07:19 |       |    | night 동안 PCD<br>drain 0 checked.<br>notify to Dr.유정훈<br>observation 하자함.                                                                                                                                                                                                                                                                 |         |     |
| 2020-09-17<br>11:00 |       |    | mental confusion<br>state<br>Lt. PCD keep state<br>로 ywllowish하게<br>소량씩 drainage<br>now<br>O2 4L/min inhaltion<br>중으로 O2 sat 93-<br>94% checked.<br>F-cath keep state로<br>urine out well<br>L-tube keep state<br>중임<br>chest pain &<br>dyspnea none<br>No fever Sx.<br>S.O.W state로 fluid<br>keep state now<br>간병인 keep state로<br>BR now |         |     |
| 2020-09-17<br>13:54 | 감염위험성 | 사정 | 배액관 삽입부위<br>불편감 없음                                                                                                                                                                                                                                                                                                                       |         | 김경아 |
| 2020-09-17<br>13:54 | 감염위험성 | 사정 | 배액관 삽입부위<br>통증 없음                                                                                                                                                                                                                                                                                                                        |         | 김경아 |
| 2020-09-17<br>13:54 | 감염위험성 | 중재 | 배액관 배액양상<br>관찰함                                                                                                                                                                                                                                                                                                                          |         | 김경아 |
| 2020-09-17<br>13:54 | 감염위험성 | 중재 | 배액관 삽입부위<br>관찰함                                                                                                                                                                                                                                                                                                                          |         | 김경아 |
| 2020-09-17<br>14:00 |       |    | 저녁부터 Diet 진행<br>& 물 100cc 진행에<br>대해 교육함                                                                                                                                                                                                                                                                                                  |         | 김경아 |

|                     |       |    |                                                                                                                                                                                          |                                        |  |
|---------------------|-------|----|------------------------------------------------------------------------------------------------------------------------------------------------------------------------------------------|----------------------------------------|--|
| 2020-09-17<br>15:03 | 감염위험성 | 평가 | 배액 잘됨                                                                                                                                                                                    |                                        |  |
|                     |       |    | mental drowsy<br>checked<br>고개끄덕임으로<br>의사표현 가능함                                                                                                                                          | Nodding Head,<br>Can express intention |  |
| 2020-09-17<br>18:54 |       |    | O2 3L/min<br>inhalation중으로 no<br>dyspnea sx<br>Lt. PCD keep중으로<br>drain중임<br>no fever & chilling<br>sx<br>freq. position<br>change & suction<br>was done<br>보호자(딸) keep<br>state로 BR now |                                        |  |



# 간호기록(NEW)

9/25 페이지

| 실시일시                | 진단명     | 구분 | 진술문                                                                                                                                                                                                                                                 | 속성/상세내역 | 작성자 |
|---------------------|---------|----|-----------------------------------------------------------------------------------------------------------------------------------------------------------------------------------------------------------------------------------------------------|---------|-----|
| 2020-09-18<br>01:16 |         |    | mental drowsy checked.<br>Both side rail up<br>중임.                                                                                                                                                                                                  |         |     |
| 2020-09-18<br>04:45 |         |    | Mental chagne none.<br>PCD keep 중임.<br>Freq. position chagne & suction was done.<br>L-tube keep 중으로 no aspiraion sx.<br>F-cath keep 중으로 urine yellowish 하게 out 됨.<br>Restrains 2points apply 중으로 혈액순환 잘 됨.<br>보호자(딸) 상주중임.<br>Both side rail up 중임. |         |     |
| 2020-09-18<br>07:10 | 활동지속성장애 | 사정 | 혈액순환 좋지 않음                                                                                                                                                                                                                                          |         |     |
| 2020-09-18<br>07:10 | 활동지속성장애 | 사정 | 침상안정 중임                                                                                                                                                                                                                                             |         |     |
| 2020-09-18<br>07:10 | 활동지속성장애 | 중재 | 운동력 사정함                                                                                                                                                                                                                                             |         |     |
| 2020-09-18<br>07:10 | 활동지속성장애 | 중재 | 영양상태를 사정함                                                                                                                                                                                                                                           |         |     |
| 2020-09-18<br>10:12 |         |    | mental drowsy checked.<br>O2 3L/min inhalation중으로 no dyspnea sx.<br>Lt. PCD keep중으로 drain중임.<br>no fever & chilling sx.                                                                                                                             |         |     |

|                     |         |    |                                                                                                                                                                                                                       |     |
|---------------------|---------|----|-----------------------------------------------------------------------------------------------------------------------------------------------------------------------------------------------------------------------|-----|
|                     |         |    | freq. position change & suction was done.<br>보호자(딸) keep 중임.                                                                                                                                                          |     |
| 2020-09-18<br>12:30 |         |    | diet try 하기 위해 regurge했으나 35cc diet color로 out됨.<br>이에 관해 notify to Dr. 유정훈<br>2pm에 점심 diet 300주자고 하며 저녁 diet는 regurge 해보고 결정하자고 함.                                                                                   | 신소희 |
| 2020-09-18<br>15:02 | 활동지속성장애 | 평가 | 혈액순환 좋음                                                                                                                                                                                                               | 신승주 |
| 2020-09-18<br>18:35 |         |    | mental drowsy checked<br>고개끄덕임으로 의사표현 가능함<br>O2 3L/min inhalation중으로 no dyspnea sx<br>Lt. PCD keep중으로 drain중임<br>no fever & chilling sx<br>diet regure되는 것 없어 L-tube 통해 diet dropping 중임<br>보호자(딸) keep state로 BR now | 신승주 |
| 2020-09-18<br>21:20 |         |    | evening 동안 Lt. PCD drain 0cc checked<br>notify to Dr 박찬수<br>-> PCD irrigation 하자함                                                                                                                                     | 신승주 |

Nodding Head,  
Can express intention

| 실시일시                | 진단명 | 구분 | 진술문                                                                                                                                                                                                                                                                                                                                                                     | 속성/상세내역 | 작성자 |
|---------------------|-----|----|-------------------------------------------------------------------------------------------------------------------------------------------------------------------------------------------------------------------------------------------------------------------------------------------------------------------------------------------------------------------------|---------|-----|
| 2020-09-28<br>06:52 |     |    | mental drowsy state.<br>freq.position change & suction was done.<br>O2 3L/min inhalation중으로 no respiration difficulty sx.<br>Lt PCD & F-cath 통해 yellowish하게 out됨.<br>oozing없으며 urine clear함.<br>보호자(딸)keep state로 br now.                                                                                                                                               |         | 조소연 |
| 2020-09-28<br>10:35 |     |    | general weakness mild함.<br>mental drowsy checked.<br>no fever & chilling sx.<br>no chest pain & discomfort sx.<br>O2 3L/min inhalation 중으로 dyspnea sx none.<br>Lt. PCD keep 중으로 yellowish하게 drainage 중임.<br>F-cath keep중으로 urine yellowish하게 out됨.<br>L-tube keep중으로 aspiration증상 없음.<br>Rt jugural cath keep 중으로 site clear함.<br>fluid dropping중임.<br>Restraints apply |         | 정재은 |

## 방사선소견서

필름번호 20200912CT020

의뢰의사

검사일자 2020-09-12

검사명 HR CT of Chest

- 1.a) Multifocal peribronchial patchy consolidation and GGO in LUL, suggesting pneumonia including aspiration pn.
  - b) BLL consolidation, r/o pneumonia.
  - c) Multifocal endobronchial secretion in left main bronchus and LLL segmental bronchus.
2. No definite evidence of PTE.
3. Large amount of bilateral pleural effusion.
4. Underlying TB sequelae in BUL.
5. Pericardial effusion.
6. R/O reactive mediastinal LNs.
7. Aneurysmal dilatation of pulmonary trunk (5.1cm).  
R/O pulmonary artery HTN.
8. Multifocal AS change with calcification in aorta and coronary arteries.

**Impression :**

C.I > r/o pneumonia

Some limitation due to motion artifact and suboptimal pulmonary artery enhancement.

- 1.a) Multifocal peribronchial patchy consolidation and GGO in LUL, suggesting pneumonia including aspiration pn.
  - b) BLL consolidation, r/o pneumonia.
  - c) Multifocal endobronchial secretion in left main bronchus and LLL segmental bronchus.
2. No definite evidence of PTE.
3. Large amount of bilateral pleural effusion.

판독일자 : 2020.09.14

판독의사 :

필름번호 20200912PO023

의뢰의사

검사일자 2020-09-12

검사명 Chest AP

total haziness in left lung.  
right pleural effusion.

**Impression :**

total haziness in left lung.  
right pleural effusion.

판독일자 : 2020.09.14

판독의사 :

필름번호 20200913PO019

의뢰의사

검사일자 2020-09-13

검사명 Chest AP

improving haziness in left lung  
multifocal consolidation in left lung, r/o pneumonia  
bilateral pleural effusion -> decreasing.  
cardiomegaly

**Impression :**

improving haziness in left lung  
multifocal consolidation in left lung, r/o pneumonia  
bilateral pleural effusion -> decreasing.  
cardiomegaly

판독일자 : 2020.09.14

판독의사 :

## 방사선소견서

필름번호 20200914PO006

의뢰의사

검사일자 2020-09-14

검사명 Chest AP

improving haziness in left lung  
multifocal consolidation in left lung, r/o pneumonia  
bilateral pleural effusion -> decreasing.  
cardiomegaly

**Impression :**

improving haziness in left lung  
multifocal consolidation in left lung, r/o pneumonia  
bilateral pleural effusion -> decreasing.  
cardiomegaly

판독일자 : 2020.09.14

판독의사 :

필름번호 20200915PO007

의뢰의사 [redacted]

검사일자 2020-09-15

검사명 Chest AP

decreased left pleural effusion and improving haziness in left lung  
otherwise,no change.

**Impression :**

decreased left pleural effusion and improving haziness in left lung  
otherwise,no change.

판독일자 : 2020.09.16

판독의사 : [redacted]



필름번호 20200916PO024

의뢰의사 [Redacted]

검사일자 2020-09-16

검사명 Chest AP

No definite evidence of radiographic interval changes since last chest radiograph.

No evidence of newly developed other abnormal findings at this time.

**Impression :**

No definite interval changes

판독일자 : 2020.09.16

판독의사 : [Redacted]

필름번호 20200917PO030

의뢰의사 [Redacted]

검사일자 2020-09-17

검사명 Chest AP

**Impression :**

bialteral pleural effusion(Lt. > Rt.).

Lt. pig tail tube insertion state.

판독일자 : 2020.09.18

판독의사 : [Redacted]

필름번호 20200917PO040

의뢰의사 [REDACTED]

검사일자 2020-09-17

검사명 Chest AP

**Impression :**

Lt. pig tail tube insertion state.

decreased Lt. pleural effusion.

no significant interval change of Rt. pleural effusion.

판독일자 : 2020.09.18

판독의사 : [REDACTED]

필름번호 20200918PO028

의뢰의사 [redacted]

검사일자 2020-09-18

검사명 Chest AP

**Impression :**

no significant interval change of bilateral pleural effusion and pul. edema.

판독일자 : 2020.09.18

판독의사 : [redacted]

필름번호 20200921PO033

의뢰의사 [redacted]

검사일자 2020-09-21

검사명 Chest AP

**Impression :**

increased Rt. pleural effusion.

no significant interval change of Lt. pleural effusion.

판독일자 : 2020.09.21

판독의사 : [redacted]

필름번호 20200922PO020

의뢰의사

검사일자 2020-09-22

검사명 Chest AP

**Impression :**

decreased bilateral pleural effusion.

판독일자 : 2020.09.22

판독의사 :

검사일자 2020-09-18

의뢰과 내과

의뢰의사

| Height              | Weight |        | BSA(mg/m <sup>2</sup> ) |       |
|---------------------|--------|--------|-------------------------|-------|
| <b>2D or M-mode</b> | RVDd   | IVSd   | LVDd                    | LVPWd |
|                     | LVDs   | Ao     | LAs                     | EF    |
| <b>Doppler</b>      | Peak E | Peak A | DT                      |       |
|                     | E/A    | E/E'   | Aov Vmax                |       |
|                     | TRVmax | RVSP   |                         |       |

### Interpretation

\*\*Infective endocarditis, severe MR

1. LV

- 1) normal LV cavity size and normal LV systolic function
- 2) normal LV wall thickness
- 3) no regional wall motion abnormality
- 4) indetermined diastolic function d/t AF

2. RV

- 1) normal RV cavity size and normal RV systolic function
- 2) normal RV wall thickness

3. Valve : trivial TR

- AV)
- MV) moderate to severe MR
- PISA Radius : 0.72 cm, MR ERO : 0.25 cm<sup>2</sup>, MR RV : 27.2 ml

4. enlarged LA

5. no pericardial effusion

6. A vegetation at MV (1.18\*1.40cm sized) with invasion to paravalvular apparatus

7. no pulmonary hypertension : RVSP (by TR Vmax)=38.6 mmHg, assumed RAP=5 mmHg.

**Conclusion**

Normal sized LV with Normal LV systolic function  
indetermined diastolic function d/t AF  
No RWMA  
Moderate to severe MR  
A vegetation at MV (1.18\*1.40cm sized)

imp) improved RVSP (62.5-->38.6mmHg), compared to the prev. echo (2020.9.14)  
Infective endocarditis with paravalvular invasion

rec) consider surgical treatment for IE if clinically appropriate

Report Date : 2020-09-18 17:27

검사자

보고자

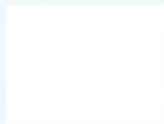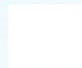



# < 동 의 서 >

## <Agreement>

환자 상태에 설명 들었으며 감염성 심내막염 및 감염성 흉수로 인해 항생제 써야하는 상황에 대해 설명 들었습니다.

I have been told the patient's condition and have been told about the circumstances in which antibiotics should be used due to infectious endocarditis and infectious pleural effusion. 둘째 아드님께서 뇌 상태 악화 예방을 위해 dapsone 써야 함을 강력히 주장하였습니다.

The patient's second son urged the medical staff to use dapsone to prevent deteriorating brain conditions.

Dapsone 이 백혈구 수치 낮추는 등의 부작용으로 환자에게 사용시 치료에 악영향 줄 수 있음을 설명 들었고, 추후 환자 상태 악화 및 사망 가능성 설명 들었습니다.

As a side effect of lowering the white blood cell count of Dapsone, I was told that it may adversely affect the treatment when used in patients, and the patient's condition worsens and possible death in the future.

이에 dapsone 사용 후 환자상태 악화 및 사망 시 병원 및 의료진에게 책임을 묻지 않겠습니다.

이에 동의합니다. Therefore, I will not hold hospitals and medical staff responsible for deterioration or death after using dapsone.

relation 관계:

[Redacted]

name : 이름:

[Redacted]

(서명)

[Redacted]

(signature)

관계:

이름:

(서명)

관계:

이름:

(서명)

관계:

이름:

(서명)
